# Supplementary material for: Antiplatelet therapy and the effects of B vitamins in patients with previous stroke or transient ischaemic attack: a post-hoc subanalysis of VITATOPS, a randomised, placebo-controlled trial
Source: PubMed Central journal article supplement (PMC3361667; doi:10.1016/s1474-4422(12)70091-1), 2012-06
Supplement: mmc1.pdf [file mmc1.pdf]

# THE LANCET **Neurology**

## **Supplementary webappendix**

This webappendix formed part of the original submission and has been peer reviewed. We post it as supplied by the authors.

Supplement to: Hankey GJ, Eikelboom JW, Yi Q, et al, for the VITATOPS trial study group. Antiplatelet therapy and the effects of B vitamins in patients with previous stroke or transient ischaemic attack: a post-hoc subanalysis of VITATOPS, a randomised, placebo-controlled trial. *Lancet Neurol* 2012; published online May 2. DOI:10.1016/S1474-4422(12)70091-1.

## **VITATOPS trial study group**

*Steering committee* G J Hankey (chair), J W Eikelboom, R I Baker, A Gelavis, S C Hickling, K Jamrozik, F M van Bockxmeer, S Vasikaran. *Writing committee* G J Hankey (chair), C Chen, J W Eikelboom, K R Lees, Q Yi. *International steering committee* G J Hankey (Australia, chair), A Algra (Netherlands), C Chen (Singapore), M C Wong (Singapore), R Cheung (Hong Kong Special Administrative Region, China), L Wong (Hong Kong Special Administrative Region, China), I Divjak (Serbia and Montenegro), J Ferro (Portugal), G de Freitas (Brazil), J Gommans (New Zealand), S Groppa (Moldova), M Hill (Canada), J D Spence (Canada), K R Lees (UK), L Lisheng (China), J Navarro (Philippines), U Ranawaka (Sri Lanka), S Ricci (Italy), R Schmidt (Austria), A Slivka (USA), K Tan (Malaysia), A Tsiskaridze (Georgia), W Uddin (Pakistan), G Vanhooren (Belgium), D Xavier (India). *Data monitoring and safety committee* J Armitage (chair), M Hobbs, M Le, C Sudlow, K Wheatley, Q Yi. *Outcome and adverse events adjudication committee* W Brown, M Bulder, J W Eikelboom, G J Hankey, W K Ho, K Jamrozik, CJM Klijn, E Koedam, P Langton, E Nijboer, P Tuch. *Trial management committee* J Pizzi (1999–present), M Tang (2000–present), R Alaparathi (2009–present), M Antenucci (2006), Y Chew (2006–08), D Chinnery (2001–03), C Cockayne (2004–09), R Holt (August–October, 2009), K Loh (1999–2009), L McMullin (2003–04), G Mulholland (July, 2009–January, 2010), B Nahoo (July–October, 2009), E Read (August, 2009–November, 2009), F Smith (2002–09), C Y Yip (2008–present).

## **VITATOPS trial investigators**

*Australia* G J Hankey†, K Loh (Royal Perth Hospital, Perth, WA, number of patients 484); D Crimmins\* (Central Coast Neuroscience Research, Gosford, NSW, 102); T Davis\*, M England, V Rakic (Fremantle Hospital, Perth, WA, 63); D W Schultz\* (Flinders Medical Centre and Griffith Rehabilitation Hospital, Adelaide, SA, 53); J Frayne\* (Alfred Hospital, Melbourne, VIC, 42); C Bladin\* (Box Hill Hospital, Melbourne, VIC, 42); J Kokkinos\* (Bankstown Hospital, Sydney, NSW, 36); D Dunbabin\* (Royal Hobart Hospital, Hobart, TAS, 36); J Harper\*, P Rees, D Warden (Joondalup Health Campus, Perth, WA, 29); C Levi\*, M Parsons, M Russell, N Spratt (John Hunter Hospital, Newcastle, NSW, 26); P Clayton, P Nayagam\*, J Sharp (Beleura Private and Frankston Hospitals, Mornington, VIC, 25); K Grainger\* (Sir Charles Gairdner Hospital, Perth, WA, 16); C de Wytt\* (Greenslopes Private Hospital, Brisbane, QLD, 12); A McDougall\* (Liverpool Hospital, Sydney, NSW, 4); G A Donnan\* (National Stroke Research Institute-Austin Health, Melbourne, VIC, 4); R Grimley\*, E Neynens\* (deceased) (Nambour General Hospital, Nambour, QLD, 2); *Austria* B Reinhart, S Ropele, R Schmidt†, E Stogerer (Medical University of Graz, Graz, 178); *Belgium* P Dedeken, C Schelstraete, G Vanhooren†, A Veyt (AZ Sint-Jan AV, Bruges, 67); *Brazil* C Andre, G R de Freitas†, S E Gomes (Universidade Federal do Rio de Janeiro/Universidade Federal Fluminense/Instituto D’Or de Pesquisa e Ensino, Rio de Janeiro, 71); *China* V C T Mok, A Wong, L K S Wong† (Prince of Wales Hospital, Hong Kong Special Administrative Region, 122); R T F Cheung†, L S W Li (Queen Mary Hospital, Hong Kong Special Administrative Region, 22); *India* P Paist†, D Xavier† (St John’s Medical College and Research Institute, Bangalore, coordinated 23 centres); S Joshi\*, S Parthasaradhi (Mahavir Hospital and Research Centre, Hyderabad, Andhra Pradesh, 204); A K Roy\*, R V Varghese (St John’s Medical College Hospital, Bangalore, Karnataka, 123); K Kochar\*, R B Panwar (Sardar Patel Medical College and Associated Group of Hospitals, Bikaner, Rajasthan, 117); N Chidambaram\*, U Rajasekharan; (Rajah Muthiah Medical College and Hospital, Annamalai Nagar, Tamilnadu, 109), S Bala, J D Pandian, Y Singh\* (Christian Medical College and Hospital, Tamil Nadu, 99);

U Karadan, A Salam\* (Baby Memorial Hospital, Kerala, 92); S Shivkumar, A Sundararajan\* (Neuro Centre, Trichy, Tiruchirapalli, Tamil Nadu, 82); R Joshi, S P Kalantri\* (Mahatma Gandhi Institute of Medical Sciences, Sevagram, Maharashtra, 78); H Singh\* (Sadbhavna Medical and Heart Institute, Patiala, Punjab, 70); J M K Murthy\*, A Rath (Care Hospital, Hyderabad, Andhra Pradesh, 65); N T R Balasubramanian, A Kalanidhi\* (Railway Hospital Perambur, Chennai, Tamil Nadu, 52); K Babu\* (Care Hospital, Visakhapatnam, Andhra Pradesh, 46); A Bharani\*, P Choudhary, M Jain (Mahatma Gandhi Memorial Medical College and Maharaja Yashwantrao Hospital, Indore, Madhya Pradesh, 39); A Agarwal, M Singh\* (Chhatrapati Shahuji Maharaj Medical University, Lucknow, Uttar Pradesh, 38); R R Agarwal, R Gupta\* (Monilek Hospital and Research Centre, Jaipur, Rajasthan, 30); S Kothari\*, S Mijar (Poona Hospital, Pune, Maharashtra, 30); S Bandhishti, R S Wadia\* (Ruby Hall Clinic, Pune, Maharashtra, 27); S K Paul, S Sekhar Nandi\* (Centauri, The Albert Road Clinic, Kolkata, 26); M M Mehndiratta\* (GB Pant Hospital, Indraprastha HO, Delhi, 25); U Tukaram\* (Mediciti Hospital, Hyderabad, Andhra Pradesh, 24); K Mittal, A Rohatgi\* (Sir Ganga Ram Hospital, New Delhi, Delhi, 21); S Kumar\*, K P Vinayan (Amrita Institute of Medical Sciences, Cochin, Kerala, 19); R S Muralidharan\* (KS Hospital, Bangalore, Karnataka, 2); *Italy* M G Celani, L Favorito, T Mazzoli, S Ricci†, E Righetti (Perugia Stroke Service, Perugia, 73); M Blundo, A Carnemolla, G D'Asta, A Giordano, F Iemolo\* (Ospedale R Guzzardi, Vittoria, 32); M G Celani, L Favorito, T Mazzoli, S Ricci†, E Righetti (Citta' della Pieve Stroke Service, Citta' della Pieve, 23); P Gresele\*, F Guercini (University of Perugia, Perugia, 20); R Caporalini, L De Dominicis\*, M Giovagnetti, G Giuliani\*, S Paoletti, E Pucci (Ospedale di Macerata, Macerata, 18); A Cavallini\*, A Persico (IRCCS C Mondino, Pavia, 16); F Casoni, A Costa\*, M Magoni\*, R Spezi, R Tortorella, E Venturelli, V Vergani (Spedali Civili di Brescia, Brescia, 9); S Caprioli, M Provisone, D Zanotta\* (Ospedale di Circolo, Busto Arsizio, 5); *Malaysia* J M Abdullah\*, T Damitri, B Idris\*, S Sayuthi (Hospital Universiti Sains of Malaysia, Kubang Kerian, 68); J J H Hong, C T Tan, K S Tan† (University of Malaya Medical Centre, Kuala Lumpur, Selangor, 13); *Moldova* G Dutca, V Grigor, S Groppa†, D Manea (City Emergency Hospital, Chisinau, 114); *Netherlands* S Achterberg, A Algra†, P H A Halkes, L J Kappelle\* (University Medical Center Utrecht, Utrecht, 61); A M Boon, J C Doelman, R Sips\*, F Visscher (Oosterscheldeziekenhuis, Goes, 37); V I H Kwa\*, O A Tenede, J J van der Sande (Slotervaartziekenhuis, Amsterdam, 14); *New Zealand* T Frendin, J Gommans† (Hawke's Bay Hospital, Napier, 101); N E Anderson\*, P Bennett, A Charleston, D Spriggs (Auckland City Hospital, Auckland, 62); J Singh\* (North Shore Hospital, North Shore, 12); J Bourke\*, R Bucknell (Palmerston North Hospital, Palmerston North, 6); H McNaughton\* (Wellington Hospital, Wellington, 3); *Pakistan* A Anwar, H Murtaza, W Uddin† (Pakistan Ordinance Factories Hospital, Wah Cantt, Wah, 140); J Ismail\* (Dow University of Health Sciences Civil Hospital, Karachi, 89); N U Khan\* (KRL University, Islamabad, 2); *Philippines* J C Navarro† (Jose R Reyes Memorial Medical Center, Manila, 411); V G Amor, M T Canete\*, C Lim, E B Ravelo, M Siguenza, M O Villahermosa (Chong Hua Hospital, Cebu City, 137); M T Canete\*, M J T Cardino, R Cenabre, M Gara, Z Salas (Cebu Velez General Hospital/ Visayas Community Medical Center, Cebu City, 126); A Batac, M T Canete\*, L Conde, P Dumdum, F S Garcia, S Libarnes, N Matig-a, N Olanda (Cebu Doctor's Hospital, Cebu City, 113); R Arcenas, M T Canete\*, A Lorana (Vicente Sotto Memorial Medical Center, Cebu City, 104); A Surdilla\* (Cagayan de Oro Medical Center, Cebu City, 32); M L Araullo, J Lokin\* (University of Santo Tomas Hospital, Manila, 13); G Maylem\* (Cagayan Valley Medical Center, Tuguegarao, 1); *Portugal* E Marques, M Veloso\* (Hospital

Distrital Oliveira de Azemeis, Oliveira de Azemeis, 61); M Correia†, G Lopes (Hospital Geral de Santo Antonio, Porto, 35); P Canhao, J M Ferro†, T P Melo (Hospital de Santa Maria, Porto, 27); A Dias, A P Sousa\* (Hospital Visconde de Salreu, Estarreja, 13); *Georgia* A Tsiskaridze†, T Vashadze (Sarajishvili Institute of Neurology, Tbilisi, 118); *Serbia* I Divjak† (University of Novi Sad [Neurology], Novi Sad, 67); I Divjak†, V Papic (University of Novi Sad [Neurosurgery], Novi Sad, 40); *Singapore* H M Chang, C P L H Chen†, D A De Silva, E K Tan\*, M C Wong (Singapore General Hospital, 875); *Sri Lanka* U K Ranawaka†, J C Wijesekera (National Hospital of Sri Lanka, Colombo, 274); H A de Silva\*, U K Ranawaka†, C N Wijekoon (University of Kelaniya, Columbo, 87); *UK* J Dawson, P Higgins, K R Leest†, L MacDonald, K McArthur, Y McIlvenna, T Quinn, M Walters (Western Infirmary/ University of Glasgow, Glasgow, 432); R Curless\*, J Dickson, J Murdy, A Scott (North Tyneside District Hospital, North Shields, Tyne And Wear, 195); S Cameron, K Darnley, M Dennis\*, D Lyle (Western General Hospital, Edinburgh, 161); A Hunter, M Watt\*, I Wiggam (Royal Victoria Hospital, Edinburgh, 118); J Murdy, H Rodgers\* (Royal Victoria Infirmary, Newcastle, 97); F Dick, M Macleod, A McKenzie\* (Stirling Royal Infirmary, Stirling, 71); P Jones\*, S Jones (Bronlais General Hospital, Aberystwyth, 62); L Caudwell, M Hussain\* (Musgrove Park Hospital, Taunton, 62); M K Albazzaz\*, K Elliott, B Hardware (Barnsley District Hospital, Barnsley, 60); E Bacabac, H Martin, A Sharma\*, V Sutton (University Hospital Aintree, Liverpool, 58); H Baht, L Cowie, G Gunathilagan, D R Hargrove, D G Smithard\* (William Harvey Hospital, Ashford, Kent, 58); M Adrian, P Bath\*, F Hammonds (Nottingham University Hospitals, Nottingham, 51); H Maguire, C Roffe\*, J Rushton (University Hospital of North Staffordshire, Stoke-on-Trent, 43); M Datta-chaudhuri, K Diyazee, S Krishnamoorthy\* (Stepping Hill Hospital, Stockport, 42); K McNulty, J Okwera\* (Rotherham General Hospital, Rotherham, 39); C Hilaire, D Kelly\* (Torbay Hospital, Torbay, 38); L Barron, M James\*, N Wedge (Royal Devon and Exeter Hospital, Exeter, 37); M Bruce, M Macleod\* (Aberdeen Royal Infirmary, Aberdeen, 29); M Barber\*, D Esson (Monklands Hospital, North Lanarkshire, 19); D Ames, J Chataway\* (St Mary's Paddington Hospital, London, 17); S Bulley, K Jenkins, K Rashed\* (Yeovil Hospital, Yeovil, 15); B E A Dafalla\*, T C Venugopalan (St Luke's Hospital, Crosland Moor, Huddersfield, 14); M Ball, S Punnoose\* (Chesterfield Hospital, 13); F Justin, L Sekaran\*, S Sethuraman (Luton and Dunstable NHSFT Hospital, Luton, 13); H Goddard, J Howard, J McIlmoyle\* (Blackpool Victoria Hospital, Blackpool, 11); C Diver-Hall, M McCarron\*, M P McNicholl (Altnagelvin Hospital, Londonderry, 8); B Clamp, J Hunter, A Oke\*, K Weaver (Cannock Chase Hospital, Cannock, 7); P Fraser, C McAlpine\* (Stobhill Hospital, Glasgow, 6); J Chambers\*, H Dymond, G Saunders (Weston General Hospital, Weston-super-Mare, 6); P Langhorne\*, D Stott, F Wright (Glasgow Royal Infirmary, Glasgow, 5); K Adie, R Bland, G Courtauld, F Harrington\*, A James, A Mate, C Schofield, C Wroath (Royal Cornwall Hospital, Cornwall, 5); S Duberley, S Punekar\* (Royal Preston Hospital, Preston, 5); K Niranjana\* (Barking Hospital, Redbridge, 1); D Sandler\* (Birmingham Heartlands Hospital, Birmingham, 1); *USA* P Krishna, M Moussouttas\* (JFK Hospital, Atlantis, FL, 21); M A Notestine, A Slivka† (Ohio State University Medical Center, Columbus, OH, 15); D Vallini\* (South Carolina VA Hospital, Columbia, SC, 12); T Hwang\*, M Saverance (University of South Carolina, Columbia, SC, 7); K Booth\*, D Murphy (Abington Memorial Hospital, Abington, PA, 4).

\*Principal investigator. †National coordinator.
